# Supplementary material for: Thalamic input to motor cortex facilitates goal-directed action initiation
Source: PubMed Central journal article supplement — Curr Biol. Author manuscript; Available in PMC 2021 Sep 29. (PMC8478854; doi:10.1016/j.cub.2021.06.089), 2021-07-23
Supplement: NIHMS1722953-supplement-mmc1.pdf [file NIHMS1722953-supplement-mmc1.pdf]

**Current Biology, Volume 31**

## **Supplemental Information**

### **Thalamic input to motor cortex facilitates goal-directed action initiation**

**Naoya Takahashi, Sara Moberg, Timothy A. Zolnik, Julien Catanese, Robert N.S. Sachdev, Matthew E. Larkum, and Dieter Jaeger**

## 1. Saline injection in ALM does not affect cued licking

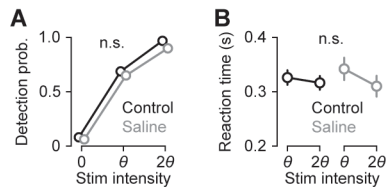

## 2. Inactivation of vM1 does not affect cued licking

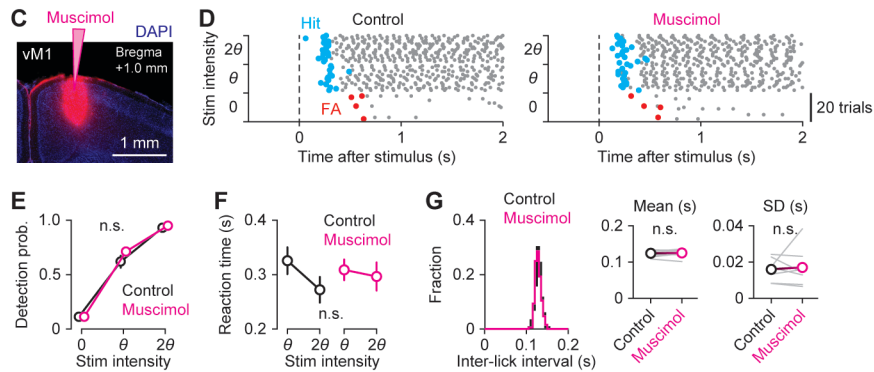

**Figure S1. Impact of vM1 inactivation on cued licking. Related to Figure 1.**

(A, B) Behavioral comparisons before (black) and after (gray) saline injection in the left ALM. (A) Detection probability ( $n = 8$  sessions from 4 mice, mean  $\pm$  SEM;  $P = 0.10$ , two-way repeated-measure ANOVA). (B) Reaction times for threshold and salient stimuli ( $n = 8$  sessions from 4 mice, mean  $\pm$  SEM;  $P = 0.81$ , two-way repeated-measure ANOVA).

(C) Site and diffusion of unilateral muscimol injection in the left vM1.

(D) Raster plot showing lick responses (gray dots) throughout a representative behavioral session before (left) and after (right) muscimol injection.

(E–G) Behavioral comparisons before (black) and after (magenta) muscimol injection. (E) Detection probability ( $n = 8$  sessions from 4 mice, mean  $\pm$  SEM;  $P = 0.20$ , two-way repeated-measure ANOVA). (F) Reaction times for threshold and salient stimuli ( $n = 8$  sessions from 4 mice, mean  $\pm$  SEM;  $P = 0.86$ , two-way repeated-measure ANOVA). (G) Histograms of inter-lick intervals in an example session (left). Insets: means (middle) and SDs (right) of inter-lick intervals ( $n = 8$  sessions from 4 mice;  $P = 0.60$  for means,  $P = 0.74$  for SDs, paired  $t$ -test).

### 1. VM axonal activity in vM1 during cued licking

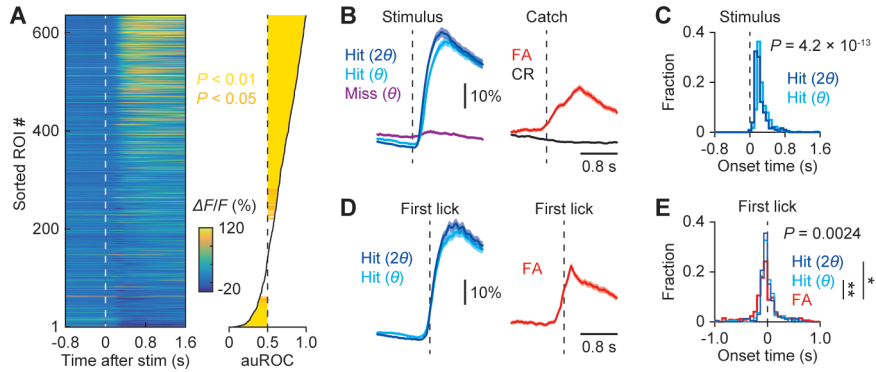

### 2. VM axonal activity in ALM in response to task-independent rewards

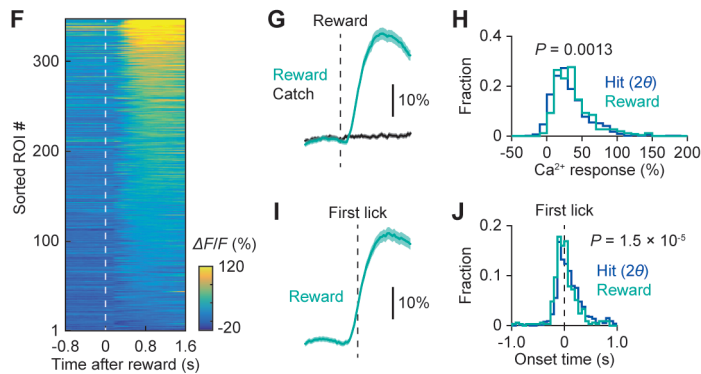

### 3. Single-unit activity in VM during licking

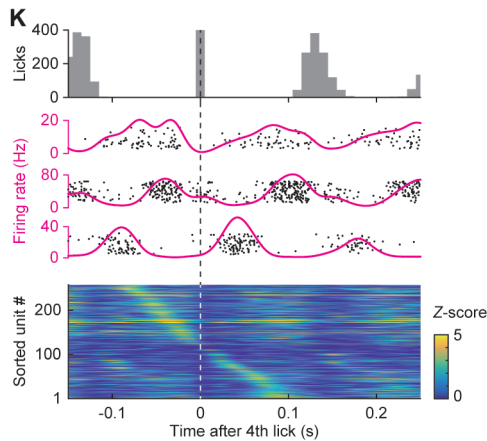

**Figure S2. VM axonal activity and VM single-unit activity during licking. Related to Figure 2.**

(A) Left:  $\text{Ca}^{2+}$  activity of VM axonal boutons in vM1 averaged across hit trials in response to threshold whisker stimuli. Right: auROCs with statistical significance indicated in colors.

(B) Left:  $\text{Ca}^{2+}$  responses to salient stimuli and threshold stimuli in hit trials (blue) vs. threshold stimuli in miss trials (purple) for axonal boutons with  $\text{auROC} > 0.5$  ( $n = 404$  boutons, mean  $\pm$  SEM). Right:  $\text{Ca}^{2+}$  activity associated with false alarm (red) vs. correct rejection (black) in catch trials.

(C) Histogram of onset timings of  $\text{Ca}^{2+}$  responses in hit trials ( $n = 404$  boutons; Wilcoxon signed-rank test).

(D)  $\text{Ca}^{2+}$  responses of axonal boutons with  $\text{auROC} > 0.5$  aligned by the timing of the first lick in hit (left) and false alarm trials (right) ( $n = 404$  boutons, mean  $\pm$  SEM).

(E) Histogram of onset timings of  $\text{Ca}^{2+}$  responses aligned by the first lick in hit and false alarm trials ( $n = 404$  boutons for hit trials and 352 boutons for false alarm trials; Kruskal-Wallis test with Scheffe's post hoc comparisons,  $*P = 0.025$ ,  $**P = 4.7 \times 10^{-3}$ ).

(F)  $\text{Ca}^{2+}$  signals in VM axonal boutons in ALM averaged across trials in response to randomly delivered water rewards ( $n = 331$  boutons from 4 sessions from 2 mice), sorted according to the peak amplitude.

(G)  $\text{Ca}^{2+}$  responses to random rewards ( $n = 331$  boutons, mean  $\pm$  SEM) compared with those in catch (no reward) trials.

(H) Histogram of amplitudes of  $\text{Ca}^{2+}$  responses to random rewards compared with those to salient stimuli in hit trials during the cued licking task ( $n = 331$  boutons for random reward trials and 856 boutons for hit trials; Mann-Whitney  $U$  test).

(I)  $\text{Ca}^{2+}$  responses to random rewards, aligned by the timing of the animal's first lick ( $n = 331$  boutons, mean  $\pm$  SEM).

(J) Histogram of onset timings of  $\text{Ca}^{2+}$  responses aligned by the first lick in random reward and hit trials ( $n = 331$  boutons for random reward trials and 856 boutons for hit trials; Mann-Whitney  $U$  test).

(K) Single-unit recording from the left VM during contralateral licking. Top: Histogram of lick times aligned by the 4th lick in a lick train triggered by reward availability (bin = 10 ms,  $n = 1190$  trials). Middle: Raster plots of single-unit activity of three representative VM neurons (black) around the 4th lick, overlaid with firing rates averaged across trials (smoothed with a 10-ms Gaussian kernel; magenta). Bottom: Normalized spike density functions of single-unit activity of VM neurons that were significantly modulated during licking ( $n = 258$  neurons with a peak  $Z$  score  $> 1.96$ ).

## 1. Viral expression of hM4Di in VM

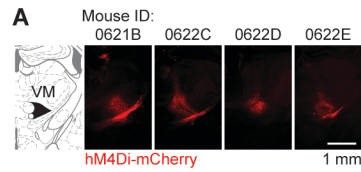

## 2. CNO alone does not affect cued licking in control mice

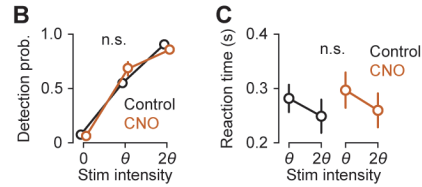

**Figure S3. hM4Di expression in virally transduced mice and impact of CNO on behavior in control mice. Related to Figure 3.**

(A) Fluorescent images of AAV-hM4Di-mCherry injection sites in the left VM thalamus.

(B, C) Behavioral comparisons before (black) and after (brown) CNO injection in left ALM of control mice (not expressing hM4Di). (B) Detection probability ( $n = 8$  sessions from 4 mice, mean  $\pm$  SEM;  $P = 0.20$ , two-way repeated-measure ANOVA). (C) Reaction times for threshold and salient stimuli ( $n = 8$  sessions from 4 mice, mean  $\pm$  SEM;  $P = 0.13$ , two-way repeated-measure ANOVA).

## 1. Viral expression of ChR2 in VM

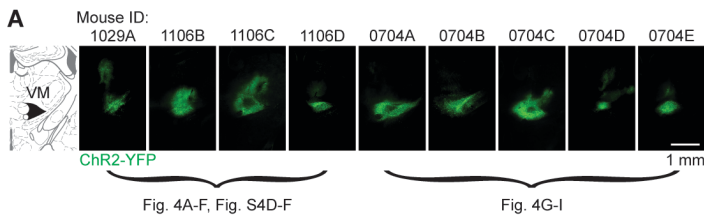

## 2. Thalamocortical synaptic activation in ALM neurons across layers

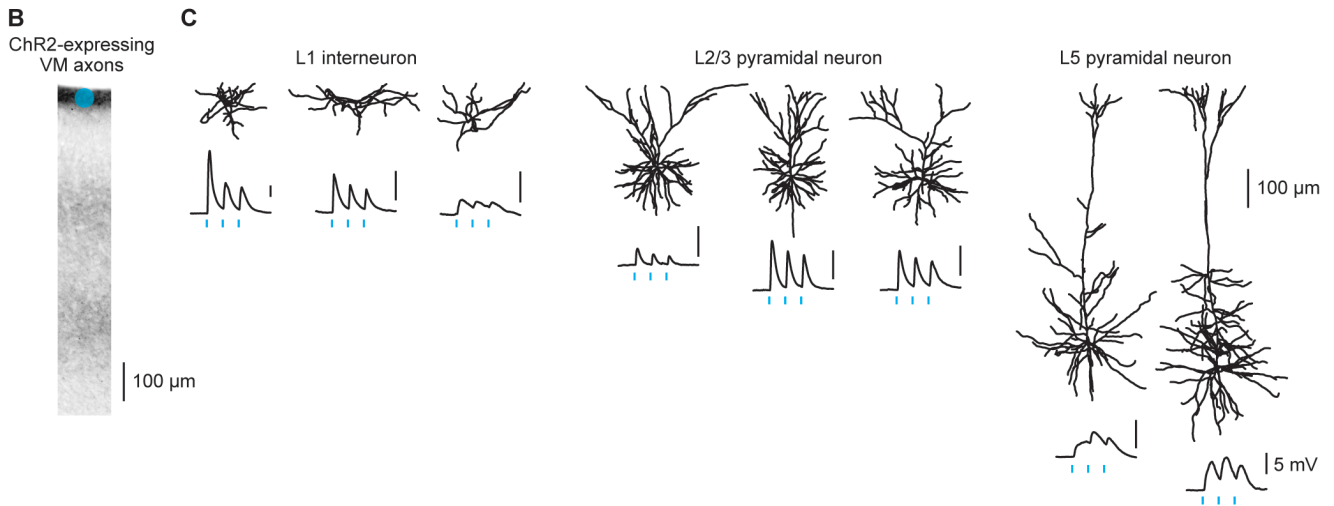

## 3. Psychometric parameters during photostimulation of VM axons in ALM

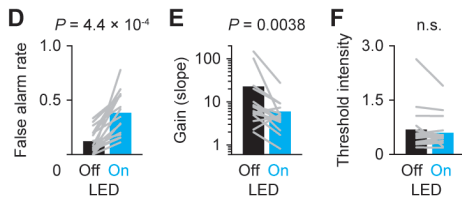

**Figure S4. Impact of photostimulation of VM axons on ALM neurons and mouse behavior. Related to Figure 4.**

- (A) Fluorescent images of AAV-ChR2-YFP injection sites in the left VM thalamus.
- (B) ChR2-expressing VM axonal fibers (black) in ALM. The blue circle indicates the photostimulation site.
- (C) Top: Reconstructed morphologies of 8 ALM neurons in L1, L2/3, and L5. Bottom: EPSPs responses to photostimulation in L1 (3 pulses at 20 Hz; indicated by blue lines).
- (D–F) Impact of photostimulation on psychometric parameters, i.e., (D) false alarm rate, (E) gain (slope), and (F) threshold intensity ( $P = 0.61$ ) ( $n = 16$  sessions from 4 mice, Wilcoxon signed-rank test).
